# Supplementary material
Source: PubMed Central journal article supplement (PMC2705964)
Supplement: NIHMS31029-supplement-02.pdf [file NIHMS31029-supplement-02.pdf]

Supplementary Figure 1B

3'NCR of all *nimbus* (*BgI*) elements arranged in the order they occur in the BAC clone (truncated element cassettes A, B and C and full-length elements I, II and III)

| Element | bp    | 3' NCR conserved region            | 16 bp 3' RE     | 3' NCR conserved region                                                | tandem repeat (TCAAn or CAAn)                                              | Start of next Sequence (with or - TSD) | bp                                     |       |
|---------|-------|------------------------------------|-----------------|------------------------------------------------------------------------|----------------------------------------------------------------------------|----------------------------------------|----------------------------------------|-------|
| A.1     | 612   | TGAACATGCACTATTACATTAGATTTTACCAATA | TTTAAATTTTACTAC | CTTTACTATTTAACTGTGAATAGACCTTAAATTTAATTATATTACTGTATAGAATCTGGCCCTTGTGTTT | ---AGAGAGAGAGTAGTCCCTTAAGGGACTGCAGGCACGACATGGCCCTAAATTTGTGCCGATGTGCC       | TCAAAATCAACAAATCAAAATCAAAATCA          | ACTATTTAATAATGTCGACCTGGGAAGTACTGGGC    | 862   |
| A.2     | 911   | TGAACATGCACTATTACATTAGATTTTACCAATA | TTTAAATTTTACTAC | CTTTACTATTTAACTGTGAATAGACCTTAAATTTAATTATATTACTGTATAGAATCTGGCCCTTGTGTTT | ---AGAGAGAGAGTAGTCCCTTAAGGGACTGCAGGCACGACATGGCCCTAAATTTGTGCCGATGTGCC       | TCAAAATCAACAAATCAAAATCA                | GAGTGGCAGAACCGATGGGAGGCTGAGACTCACAGTA  | 1155  |
| A.3     | 1491  | TGAACATGCACTATTACATTAGATTTTACCAATA | TTTAAATTTTACTAC | CTTTACTATTTAACTGTGAATAGACCTTAAATTTAATTATATTACTGTATAGAATCTGGCCCTTGTGTTT | ---AGAGAGAGAGGGATCCCTTAAGGGACTGCAGGCACGACATGGCCCTAAATTTGTGCCGATGTGCC       | TCAAAATCAAAAAATTAATCAAA                | ACCAGGGATGAAATGACCGGGATGAAGCGACCAAGG   | 1739  |
| II      | 34060 | TGAACATGCACTATTACATTAGATTTTACCAATA | TTTAAATTTTACTAC | CTTTACTATTTAACTGTGAATAGACCTTAAATTTAATTATATTACTGTATAGAATCTGGCCCTTGTGTTT | ---AGAGAGAGAGTAGTCCCTTAAGGGACTGCAGGCACGACATGGCCCTAAATTTGTGCCGATGTGCC       | TCAAAATCAACAAACAAACAA                  | ACATGAACATGCACTATTACATTAGATTTTACCA     | 34303 |
| B.1     | 34270 | TGAACATGCACTATTACATTAGATTTTACCAATA | TTTAAATTTTACTAC | CTTTACTATTTAACTGTGAATAGACCTTAAATTTAATTATATTACTGTATAGAATCTGGCCCTTGTGTTT | ---TTT---AGAGAGAGAGTAGTCCCTTAAGGGACTGCAGGCACGACATGGCCCTAAATTTGTGCCGATGTGCC | TCAAAATTAACAAATCAAAATCAAA              | ACCAGGATGTCAGGGGCAACATTTAGAGCCACTAA    | 34512 |
| B.2     | 34607 | TGAACATGCACTATTACATTAGATTTTACCAATA | TTTAAATTTTACTAC | CTTTACTATTTAACTGTGAATAGACCTTAAATTTAATTATATTACTGTATAGAATCTGGCCCTTGTGTTT | ---AGAGAGAGAGTAGTCCCTTAAGGGACTGCAGGCACGACATGGCCCTAAATTTGTGCCGATGTGCC       | TCAAAATCAACA                           | GAAACGGTCTTCATGCTTTCATGGTTTGTGTTCTCGT  | 34841 |
| III     | 43821 | TGAACATGCACTATTACATTAGATTTTACCAATA | TTTAAATTTTACTAC | CTTTACTATTTAACTGTGAATAGACCTTAAATTTAATTATATTACTGTATAGAATCTGGCCCTTGTGTTT | ---AGAGAGAGAGTAGTCCCTTAAGGGACTGCAGGCACGACATGGCCCTAAATTTGTGCCGATGTGCC       | TCAAAATCAACAAATCAAAATCAAAAT            | CAAAACGGACTGGGGAGCTGACAGAGATACCTTGCTGC | 44068 |
| C.1     | 45402 | TGAACATGCACTATTACATTAAATTTTACCAATA | TTTAAATTTTACTAC | CTTTACTATTTAACTGTGAATAGACCTTAAATTTAATTATATTACTGTATAGAATCTGGCCCTTGTGTTT | ---AGAGAGAGAGTAGTCCCTTAAGGGACTGCAGGCACGACATGGCCCTAAATTTGTGCCGATGTGCC       | TCAAAATCAACAAATCAAAATCAAAAT            | CAAAACGGACTGGGGAGCTGACAGAGATACCTTGCTGC | 45649 |
| C.2     | 46983 | TGAACATGCACTATTACATTAAATTTTACCAATA | TTTAAATTTTACTAC | CTTTACTATTTAACTGTGAATAGACCTTAAATTTAATTATATTACTGTATAGAATCTGGCCCTTGTGTTT | ---AGAGAGAGAGTAGTCCCTTAAGGGACTGCAGGCACGACATGGCCCTAAATTTGTGCCGATGTGCC       | TCAAAATCAACAAATCAAAATCAAAAT            | CAAAACGGACTGGGGAGCTGACAGAGATACCTTGCTGC | 47230 |
| C.3     | 48565 | TGAACATGCACTATTACATTAGATTTTACCAATA | TTTAAATTTTACTAC | CTTTACTATTTAACTGTGAATAGACCTTAAATTTAATTATATTACTGTATAGAATCTGGCCCTTGTGTTT | ---AGAGAGAGAGTAGTCCCTTAAGGGACTGCAGGCACGACATGGCCCTAAATTTGTGCCGATGTGCC       | TCAAAATCAACAAATCAAAATCAAAAT            | CAAGCTTTGGGGCGGATGAAGACTGACATCCTATTGG  | 48812 |
| C.4     | 49385 | TGAACATGCACTATTACATTAGATTTTACCAATA | TTTAAATTTTACTAC | CTTTACTATTTAACTGTGAATAGACCTTAAATTTAATTATATTACTGTATAGAATCTGGCCCTTGTGTTT | ---TAGAGAGAGAGTAGTCCCTTAAGGGACTGCAGGCACGACATGGCCCTAAATTTGTGCCGATGTGCC      | TCAAAATCAAAAAATTAAAAAATCAAAATC         | ATGAGAGAACCCATCCAAATTTAACCCCACTATTG    | 49640 |
| C.5     | 50609 | TGAACATGCACTATTACATTAGATTTTACCAATA | TTTAAATTTTACTAC | CTTTACTATTTAACTGTGAATAGACCTTAAATTTAATTATATTACTGTATAGAATCTGGCCCTTGTGTTT | ---AGATAGAGAGTAGTCCCTTAAGGGACTGCAGGCACGACATGGCCCTAAATTTGTGCCGATGTGCC       | TCAAAATCAACAAATCAAA                    | TCAACAGCTATTGGCCCTTTTATGGGCTTTAAAAA    | 50848 |
| I       | 59274 | TGAACATGCACTATTACATTAGATTTTACCAATA | TTTAAATTTTACTAC | CTTTACTATTTAACTGTGAATAGACCTTAAATTTAATTATATTACTGTATAGAATCTGGCCCTTGTGTTT | ---AGAGAGAGAGTAGTCCCTTAAGGGACTGCAGGCACGACATGGCCCTAAATTTGTGCCGATGTGCC       | TCAAAATCAACAAATCAAAATCA                | ACCATTGACCCACAAGGGGGTAGCGACTCACAGCT    | 59518 |

5'NCR of all full-length *nimbus* (*BgI*) elements arranged in the order they occur in the BAC clone (Elements I, II and III)

| Element | bp    | End of previous sequence with 5' TSD                 | 5' NCR conserved region                          | 16 bp 5' RE                                                                                                         | 5' NCR conserved region                       | bp    |
|---------|-------|------------------------------------------------------|--------------------------------------------------|---------------------------------------------------------------------------------------------------------------------|-----------------------------------------------|-------|
| II      | 28401 | GTTGGTATCCGTAACGAATCAGAAACGGTCTCGTCCCGAGACATGA       | CGTTAAATCGTCCCGAGACATGACATTAACCTGCGCTCCTCTTCT    | ---AGCATTTTGGAGCTCAAAAGTGCCTACTTCTTTCTATCATTGTGTCTGCCTCCTTTTCTAAGTCTGCCTTCATTGATCATCACACTGTCTCCTTAACTTTAAATCTCACTAC | GTCTAGACAGTCCGTTTGGCGTGGACTGCGACGGGTAAAGGGGGA | 28659 |
| III     | 39342 | GTTATCAAGGCTCACTTGACAGAGACCGACAAAGGTTAGGGCAATATCAGAG | TCGTCCCGAGACATGACGTAAACCTGCGCTCCTCTTCTTCTAGCATT  | TTTGGAGCTCAAAAGTGCCTACTTCTTTCTATCATTGTGTCTGCCTCCTTTTCTAAGTCTGCCTTCATTGATCATCACACTGTCTCCTTAACTTTAAATCTCACTAC         | GTCTAGACAGTCCGTTTGGCGTGGACTGCGACGGGTAAAGGGGGA | 39601 |
| I       | 53586 | TCAAATTTATGATGGACCTTAGGGACCGCTGGCAATCACCATTCGACCC    | CTCGTCCCGAGACATGACGTAAACCTGCGCTCCTCTTCTTCTAGCATT | TTTGGAGCTCAAAAGTGCCTACTTCTTTCTATCATTGTGTCTGCCTCCTTTTCTAAGTCTGCCTTCATTGATCATCACACTGTCTCCTTAACTTTAAATCTCACTAC         | GTCTAGACAGTCCGTTTGGCGTGGACTGCGACGGGTAAAGGGGGA | 53845 |
